# Supplementary material
Source: publisher figshare collection journal article supplement (https://adisjournals.figshare.com/articles/dataset/_/12205916)
Supplement: Supplementary file 1 [file 2]

## Real-World Safety and Effectiveness of Dimethyl Fumarate in Black or African American Patients with Multiple Sclerosis: 3-Year Results from ESTEEM

Williams, M.J., Amezcua, L., Okai, A. *et al.* Real-World Safety and Effectiveness of Dimethyl Fumarate in Black or African American Patients with Multiple Sclerosis: 3-Year Results from ESTEEM. *Neurol Ther* (2020). <https://doi.org/10.1007/s40120-020-00193-5>

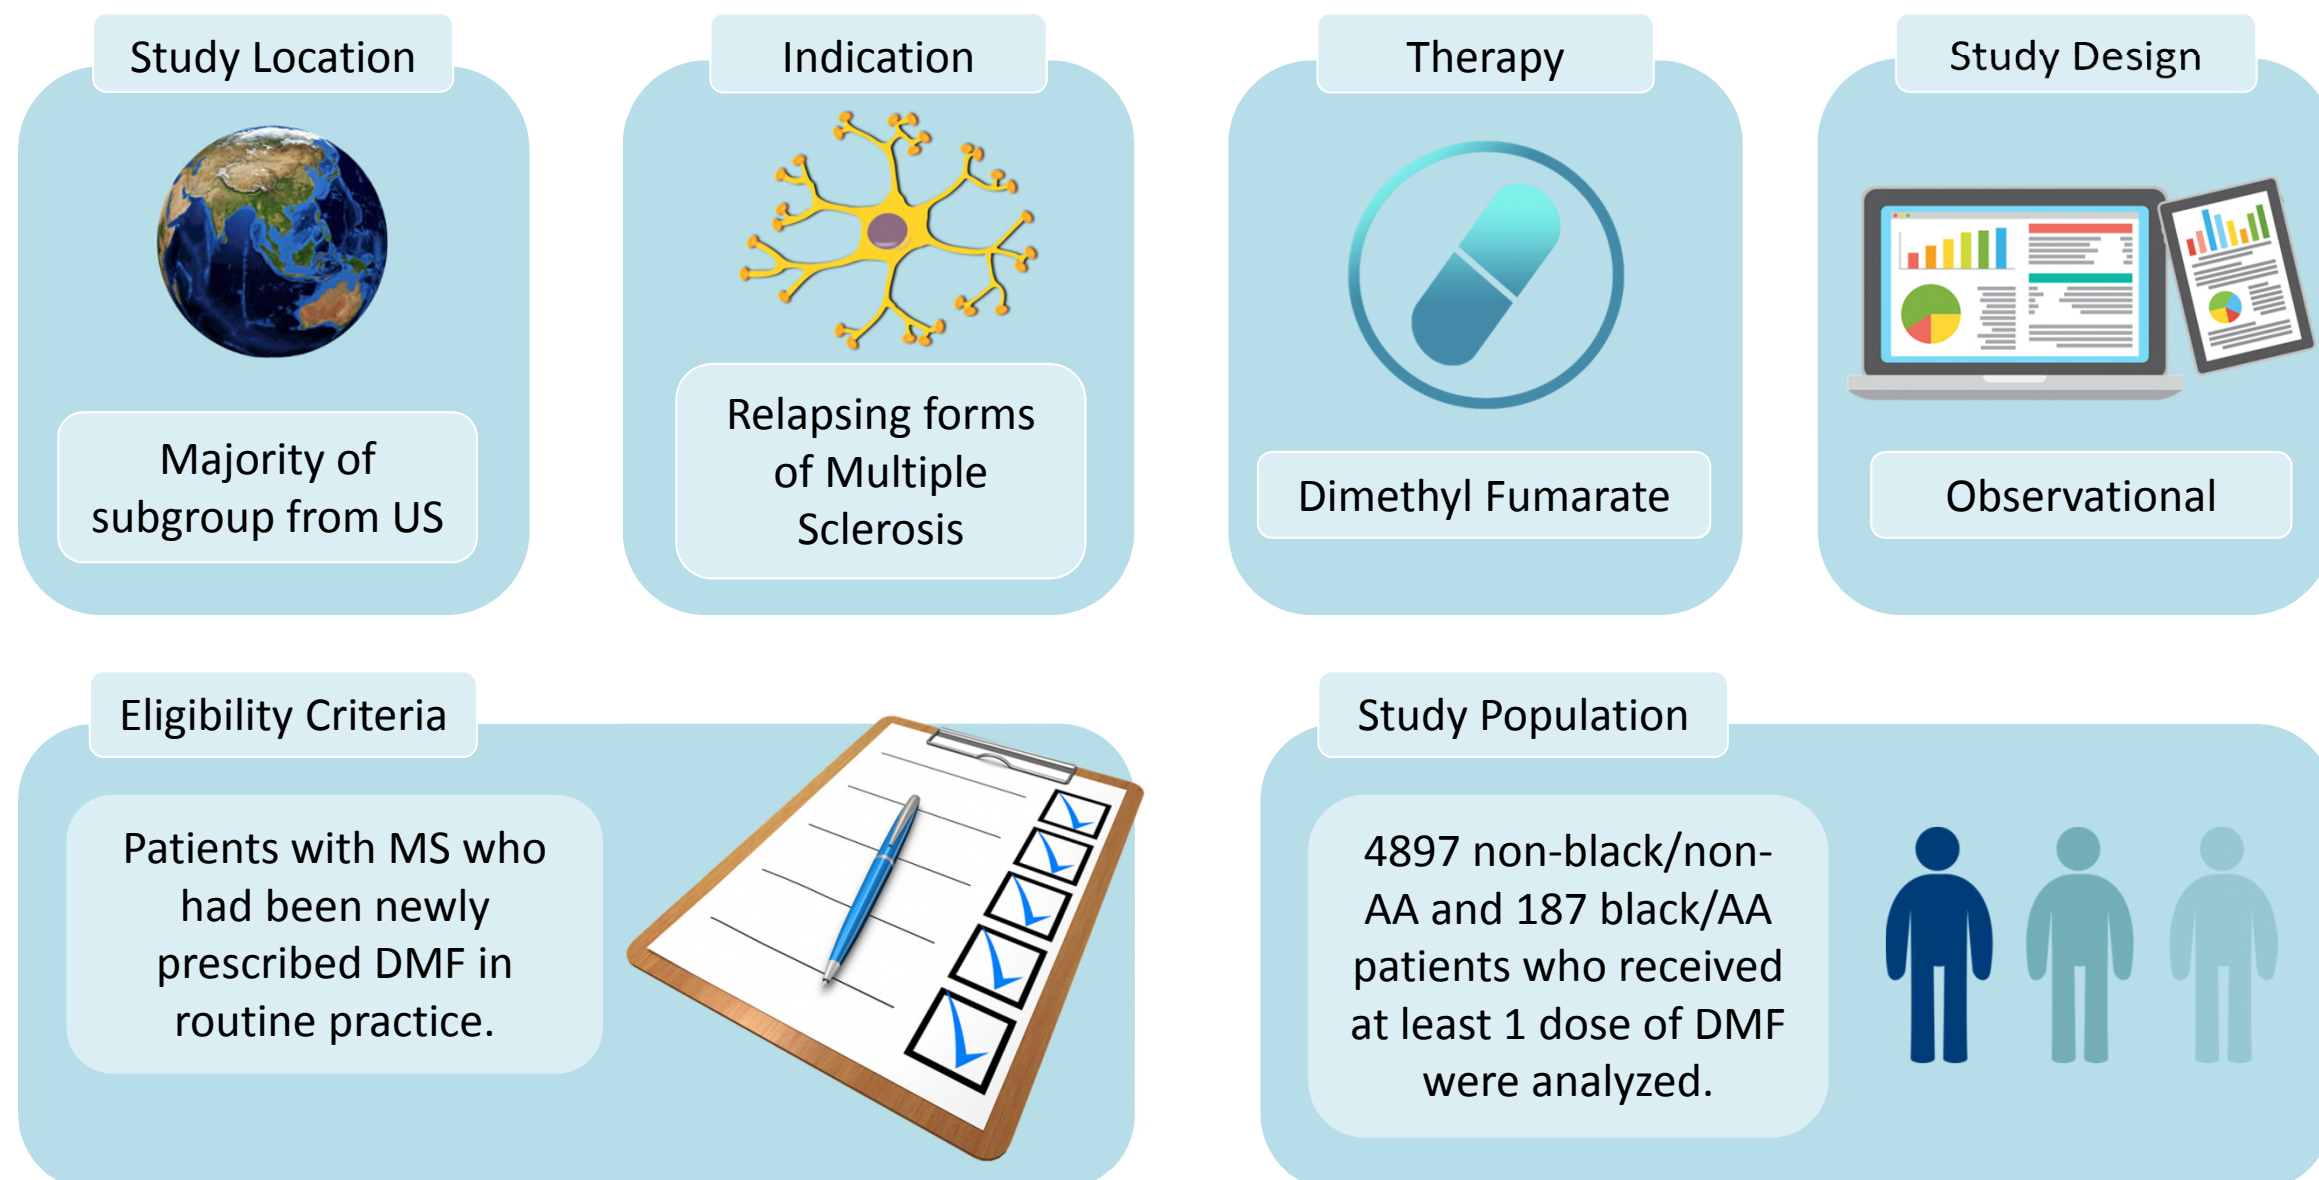

### Why this study was carried out.

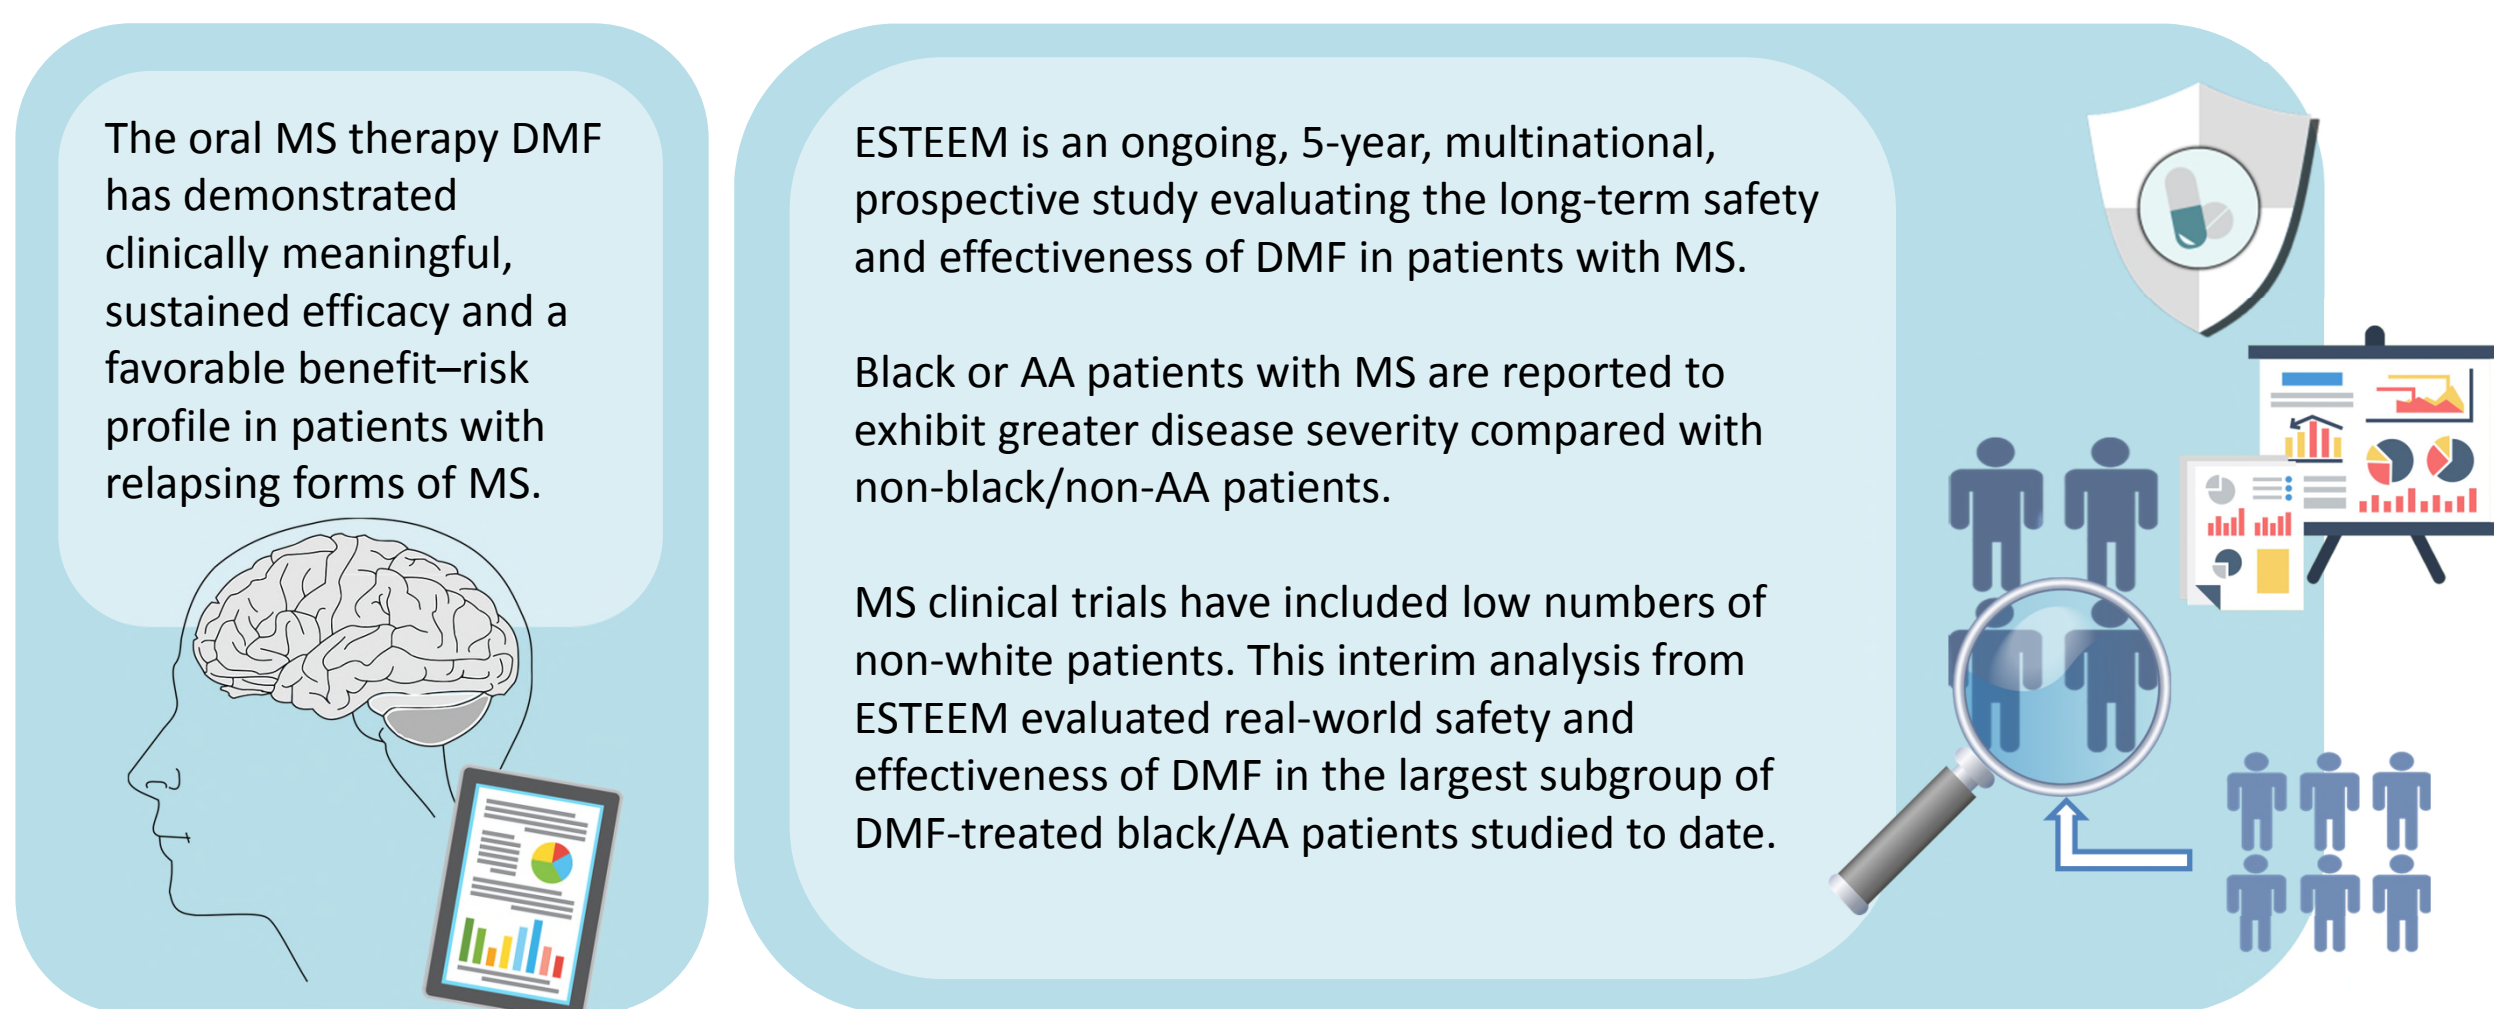

### What was learned from the study?

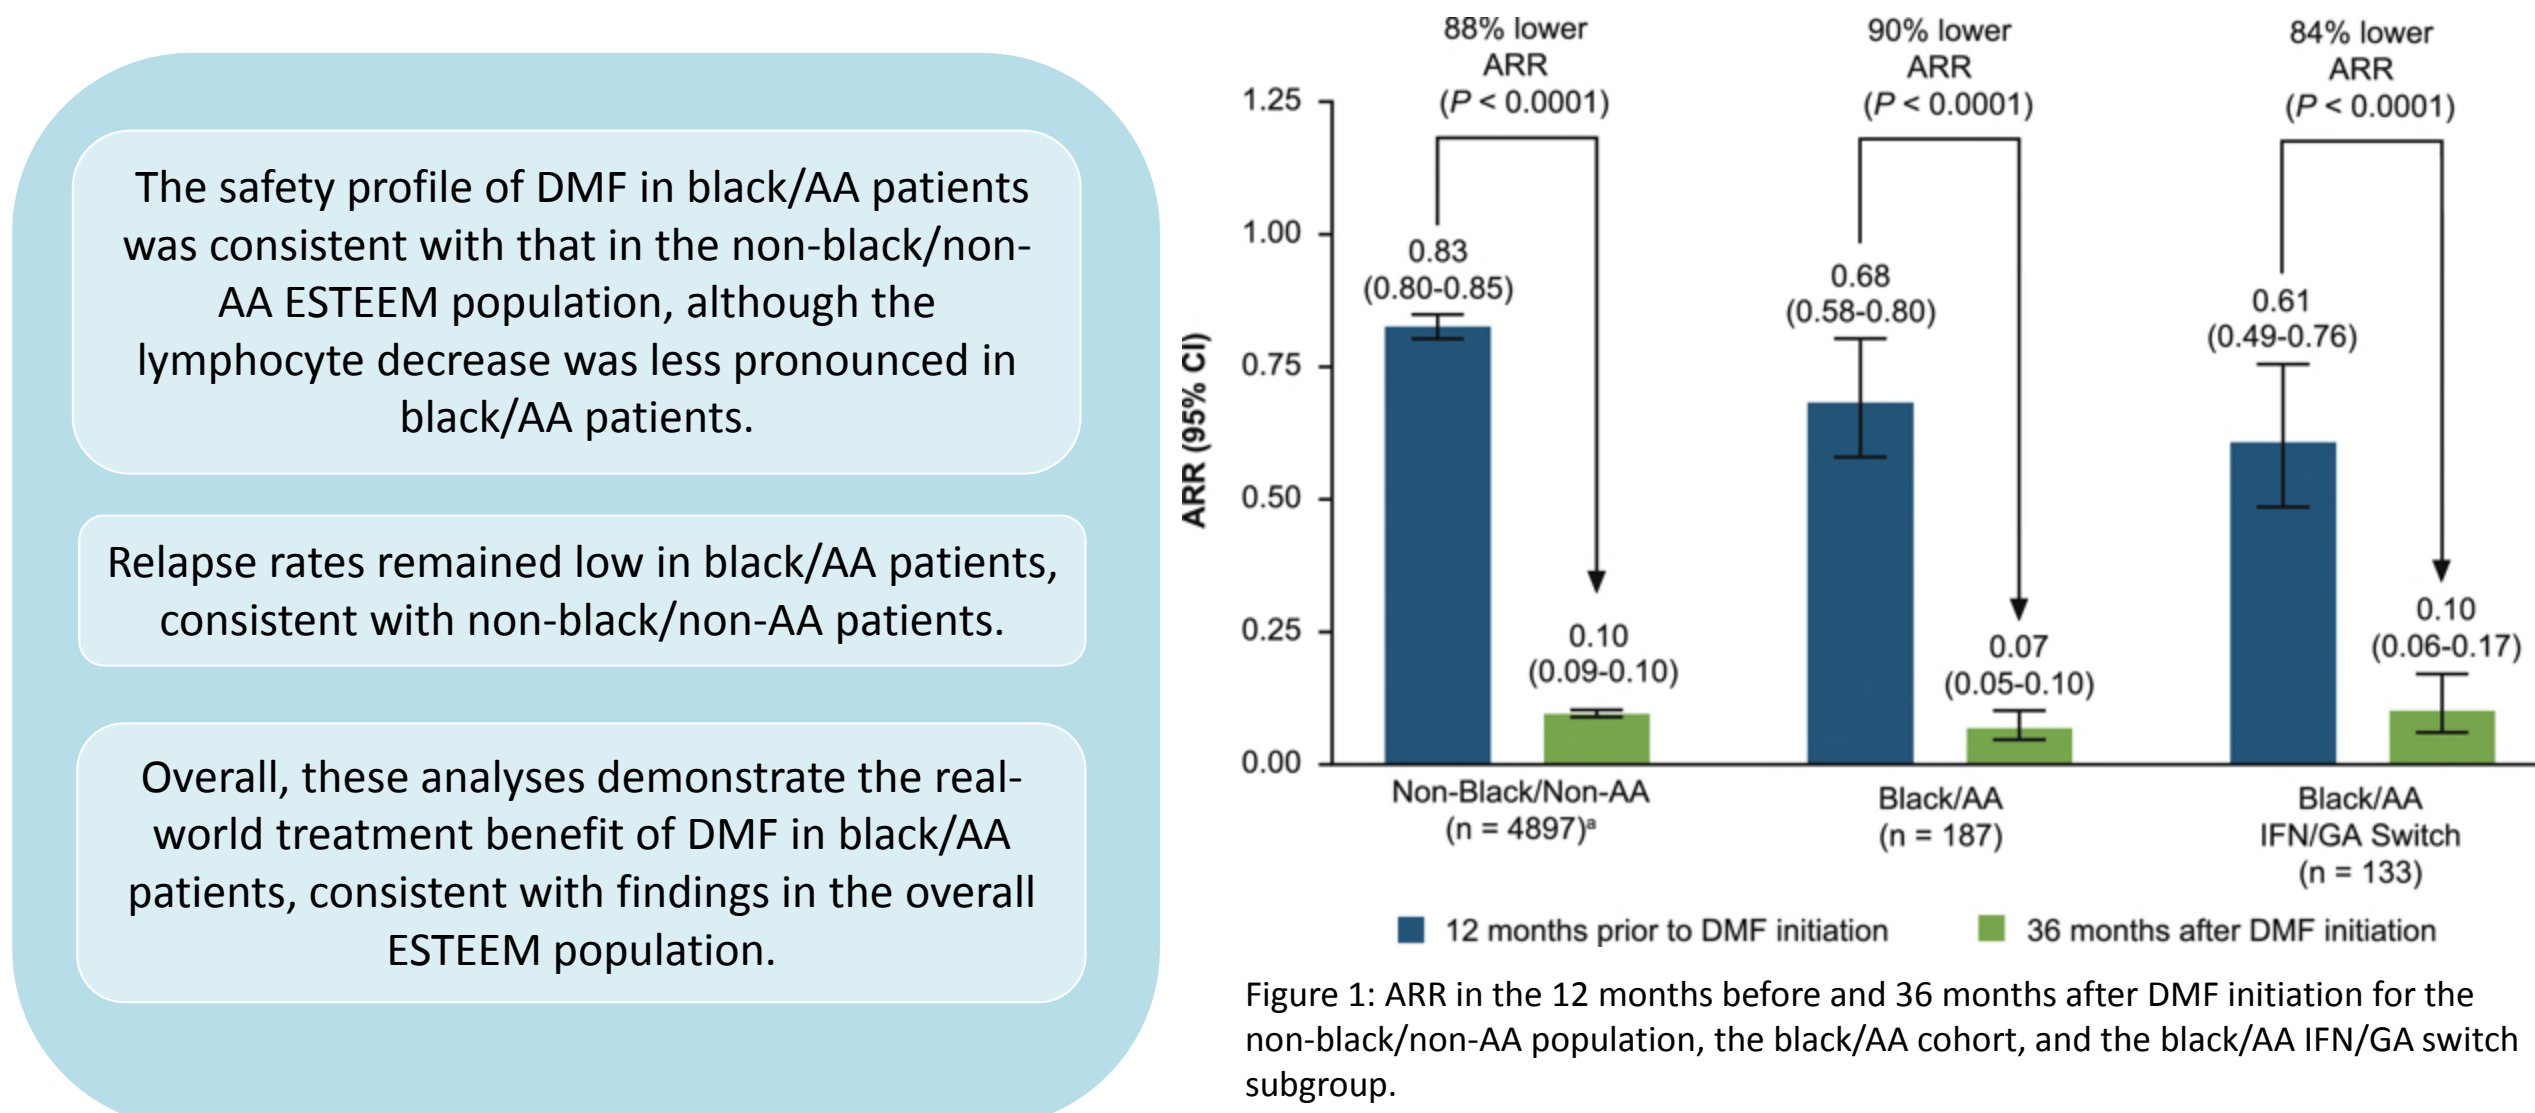

**Abbreviations:** African American (AA); Annualized relapse rate (ARR); Glatiramer acetate (GA); Interferon (IFN); Dimethyl fumarate (DMF); Multiple sclerosis (MS).
